# Supplementary figures and images for: Identification of a candidate sex determination gene in Culaea inconstans suggests convergent recruitment of an Amh duplicate in two lineages of stickleback
Source: PubMed Central journal article supplement — J Evol Biol. 2022 Jul 11;35(12):1683–95. doi: 10.1111/jeb.14034 (PMC10083969; doi:10.1111/jeb.14034), 2022-07-11

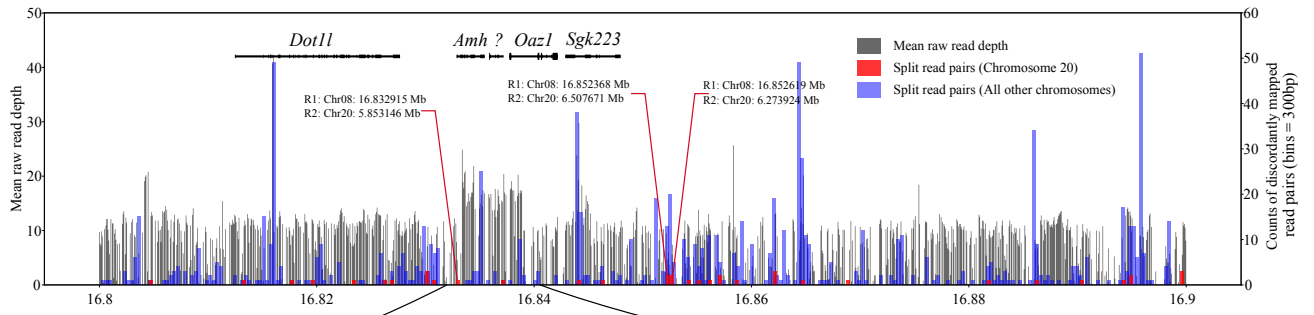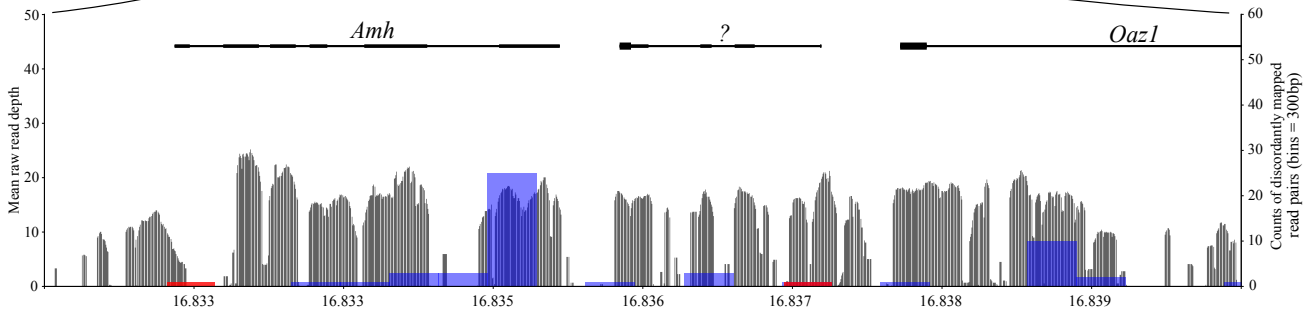

Supplement: JEB-35-1683-s002.pdf [file JEB-35-1683-s002.pdf]

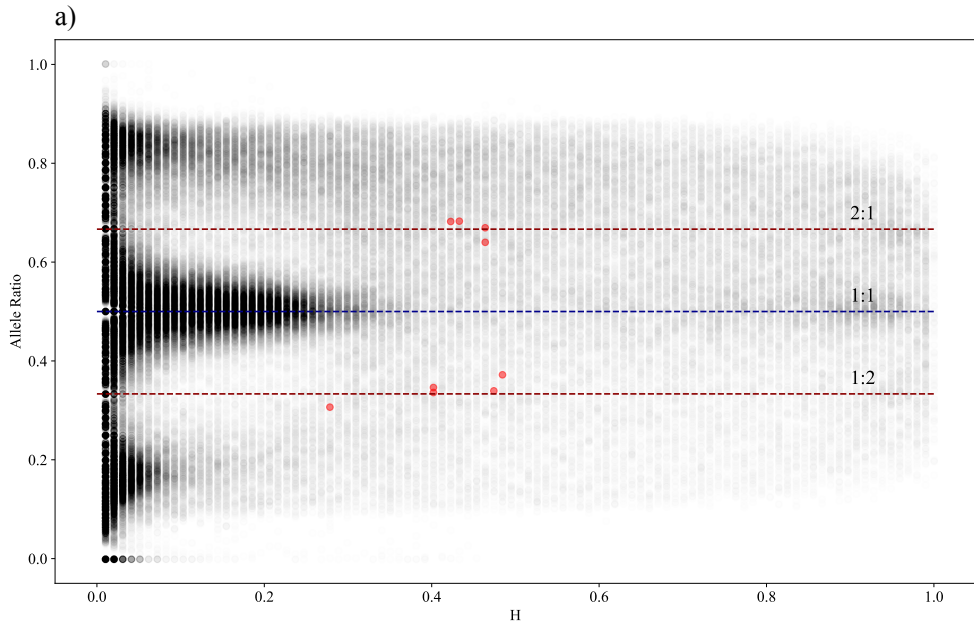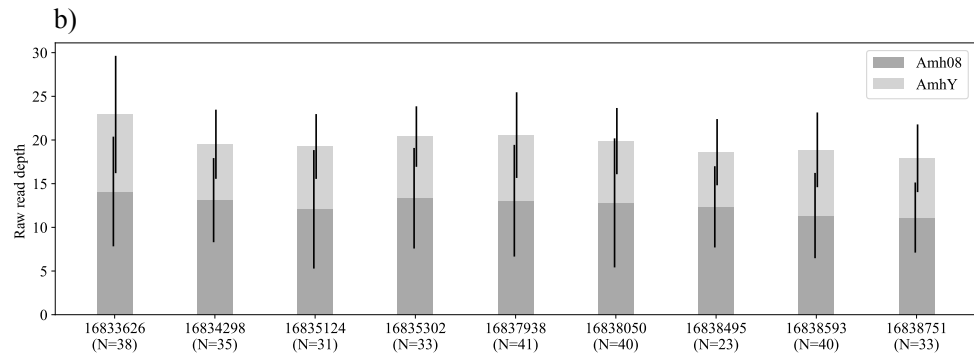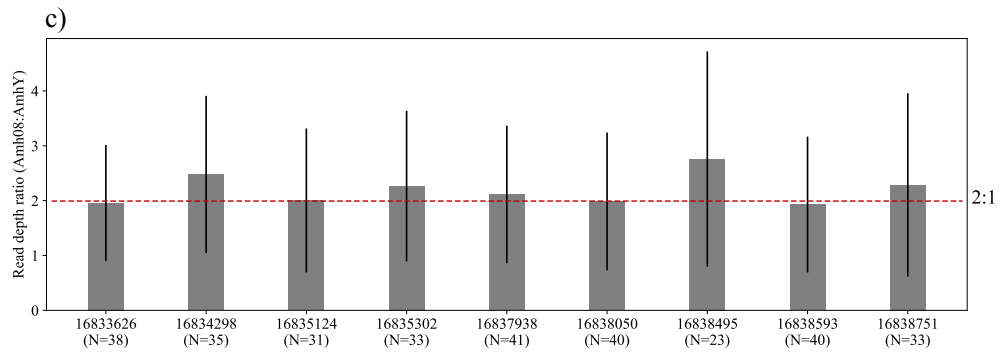

Supplement: JEB-35-1683-s003.pdf [file JEB-35-1683-s003.pdf]

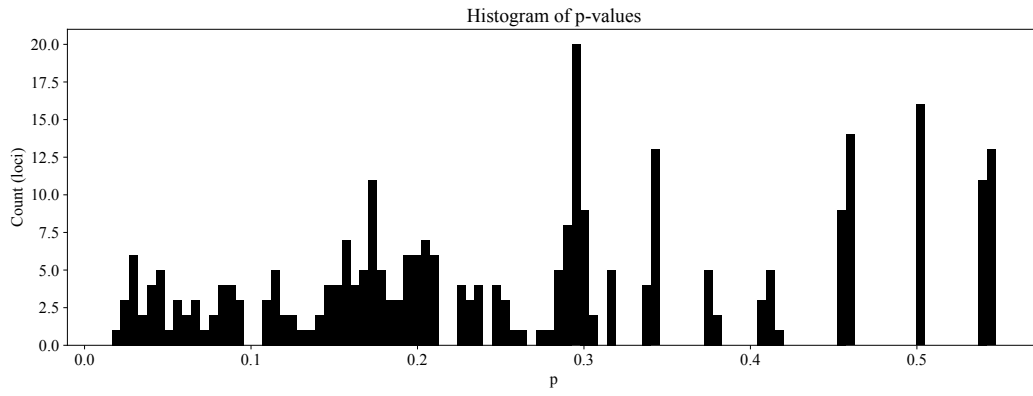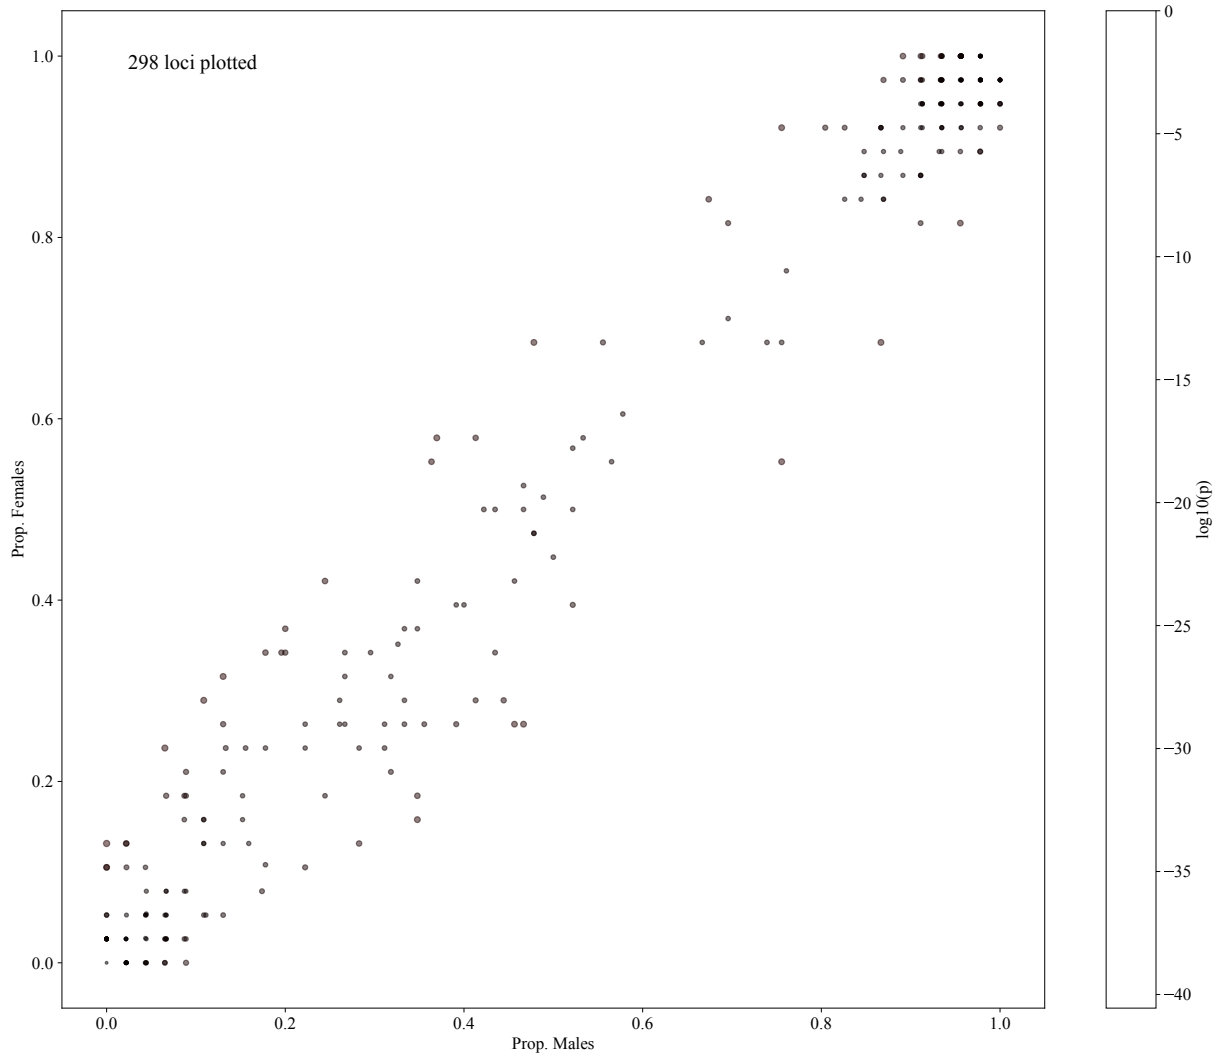

Supplement: JEB-35-1683-s004.pdf [file JEB-35-1683-s004.pdf]

a)

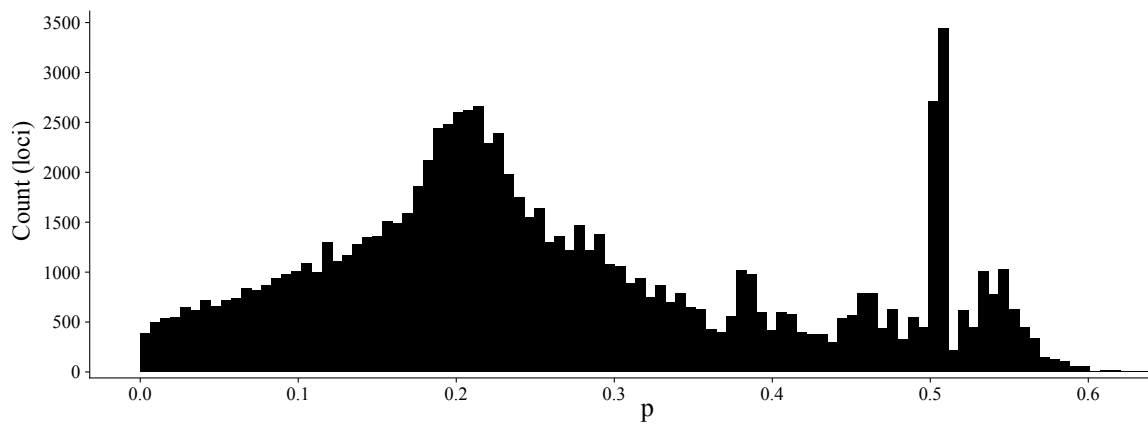

b)

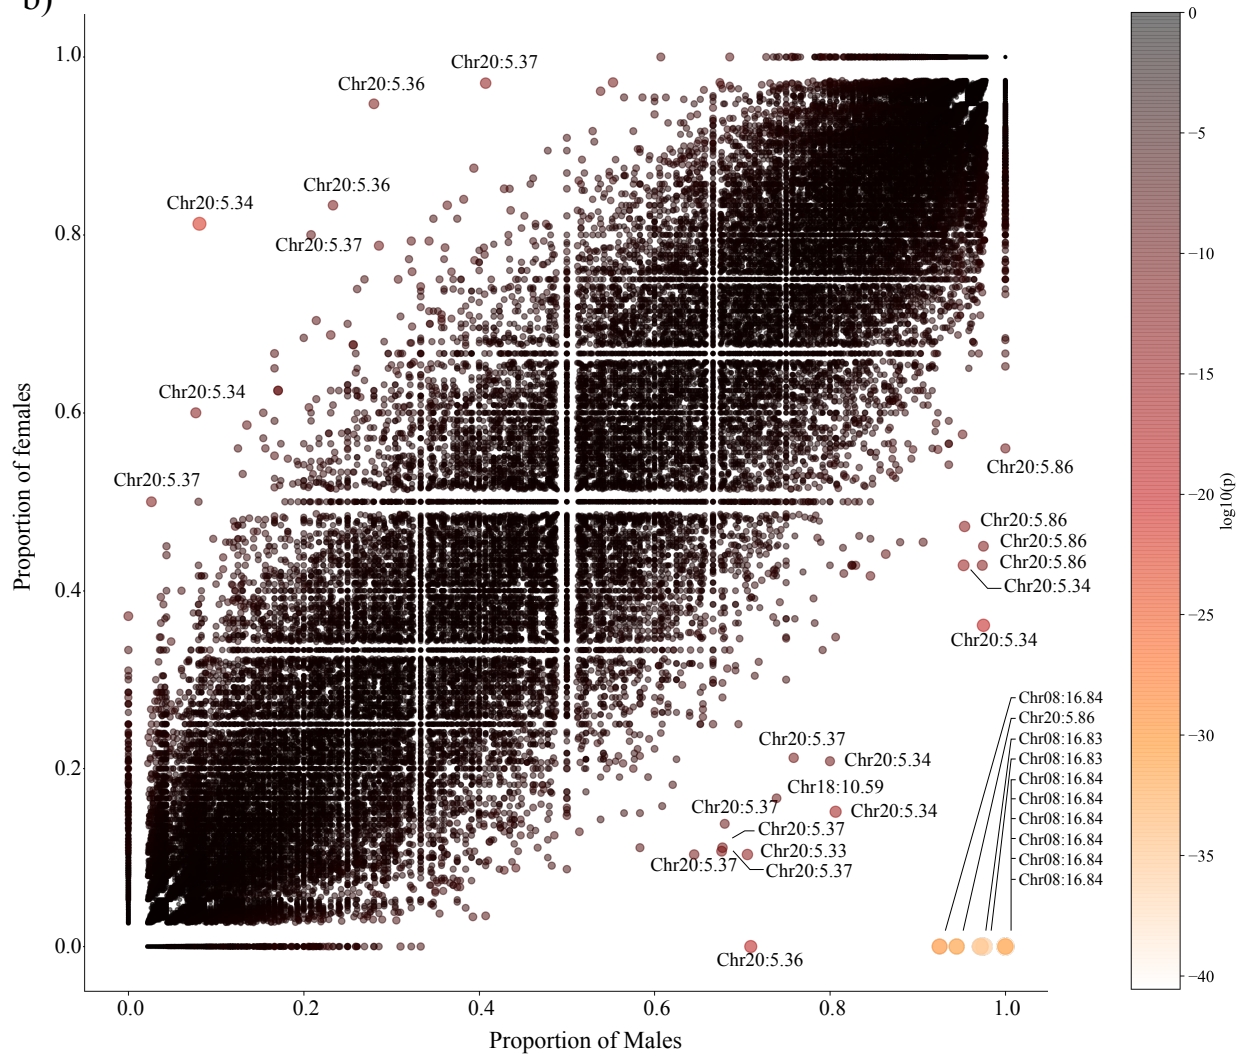

Supplement: JEB-35-1683-s005.pdf [file JEB-35-1683-s005.pdf]

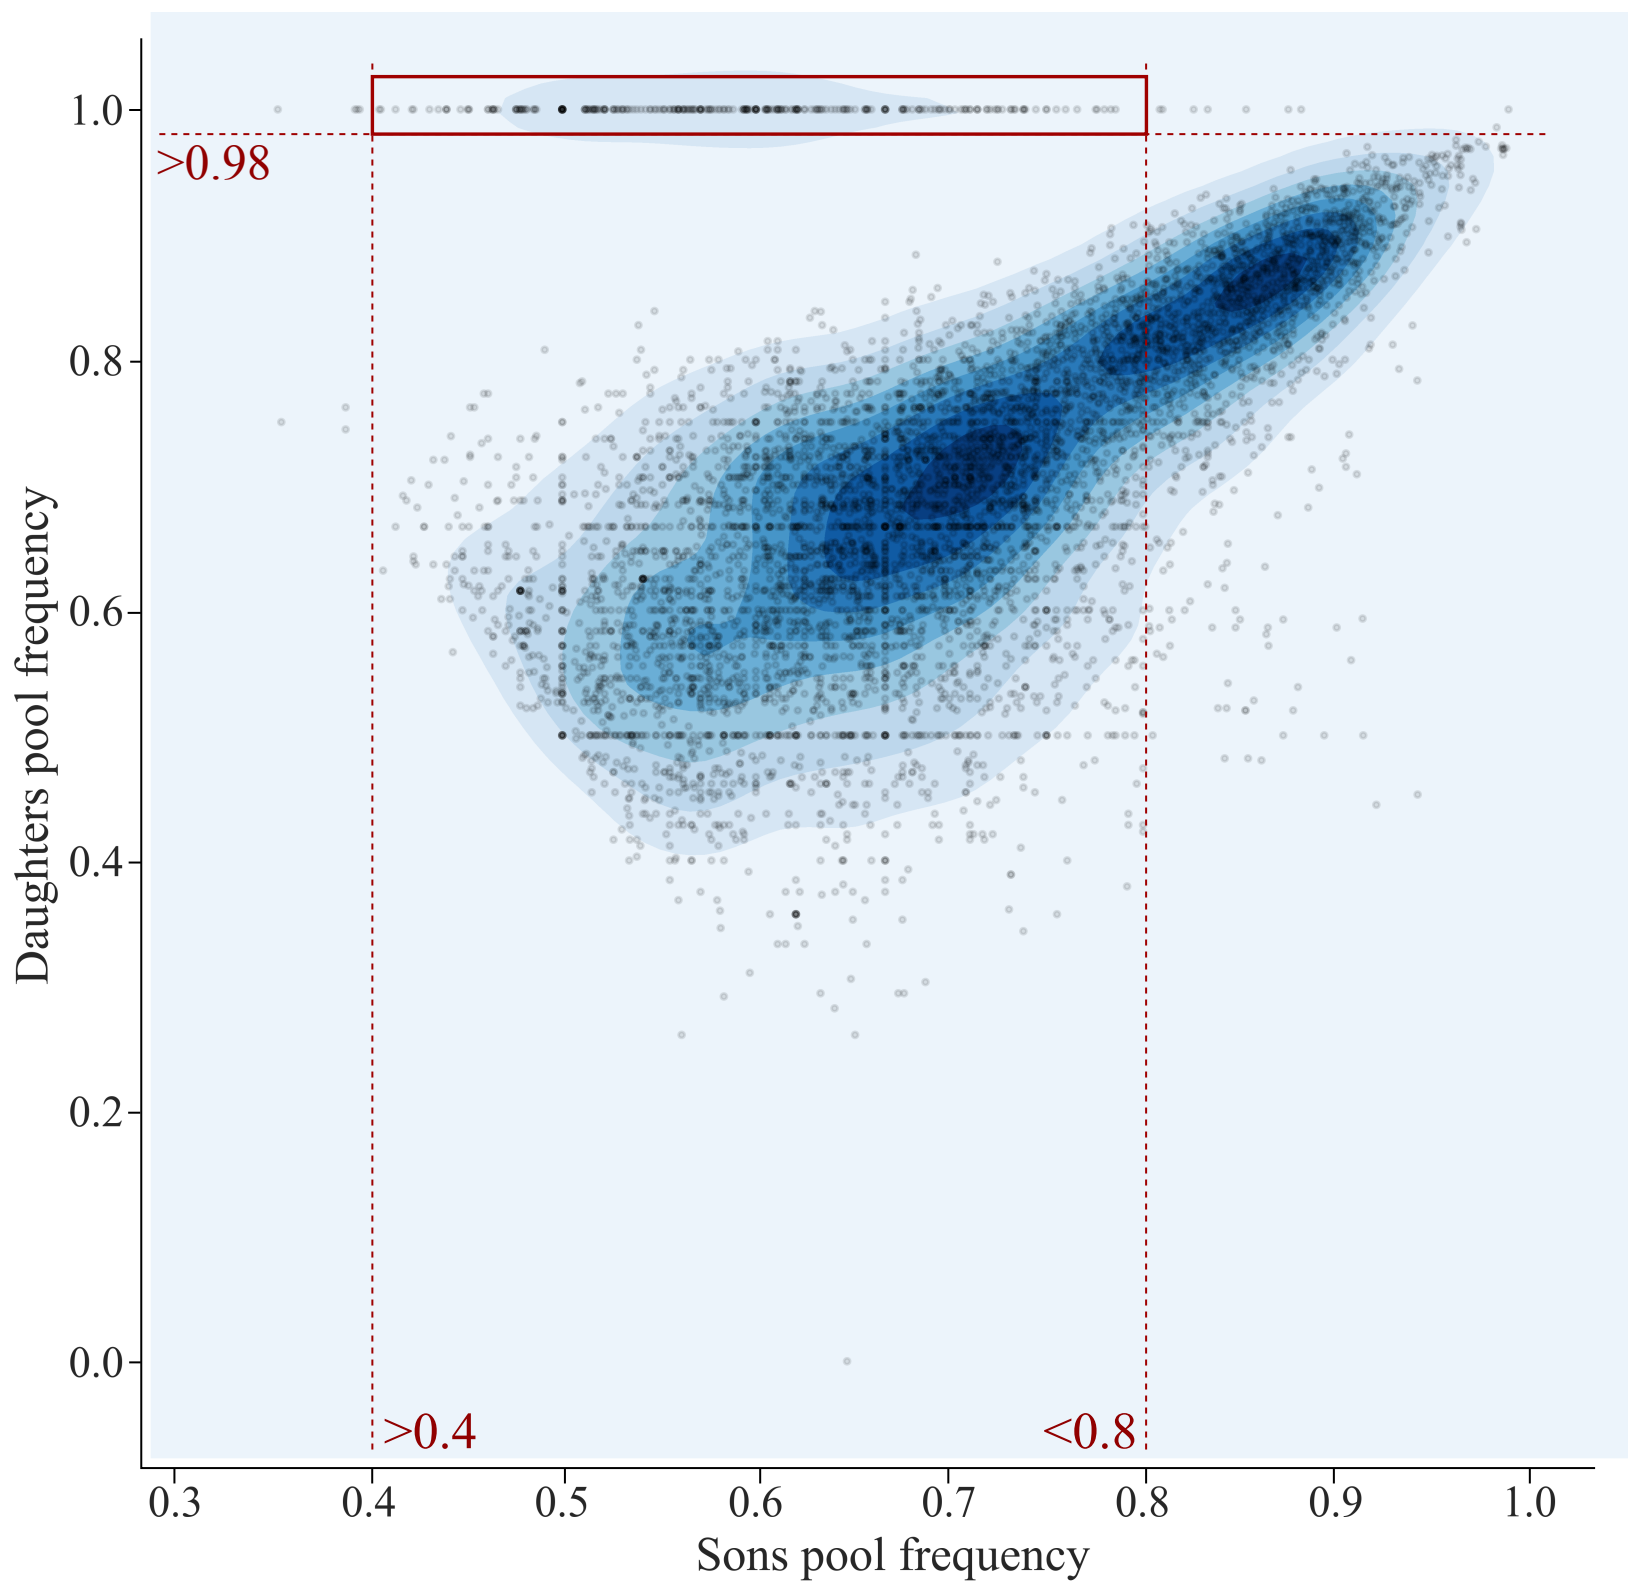

Supplement: JEB-35-1683-s006.pdf [file JEB-35-1683-s006.pdf]

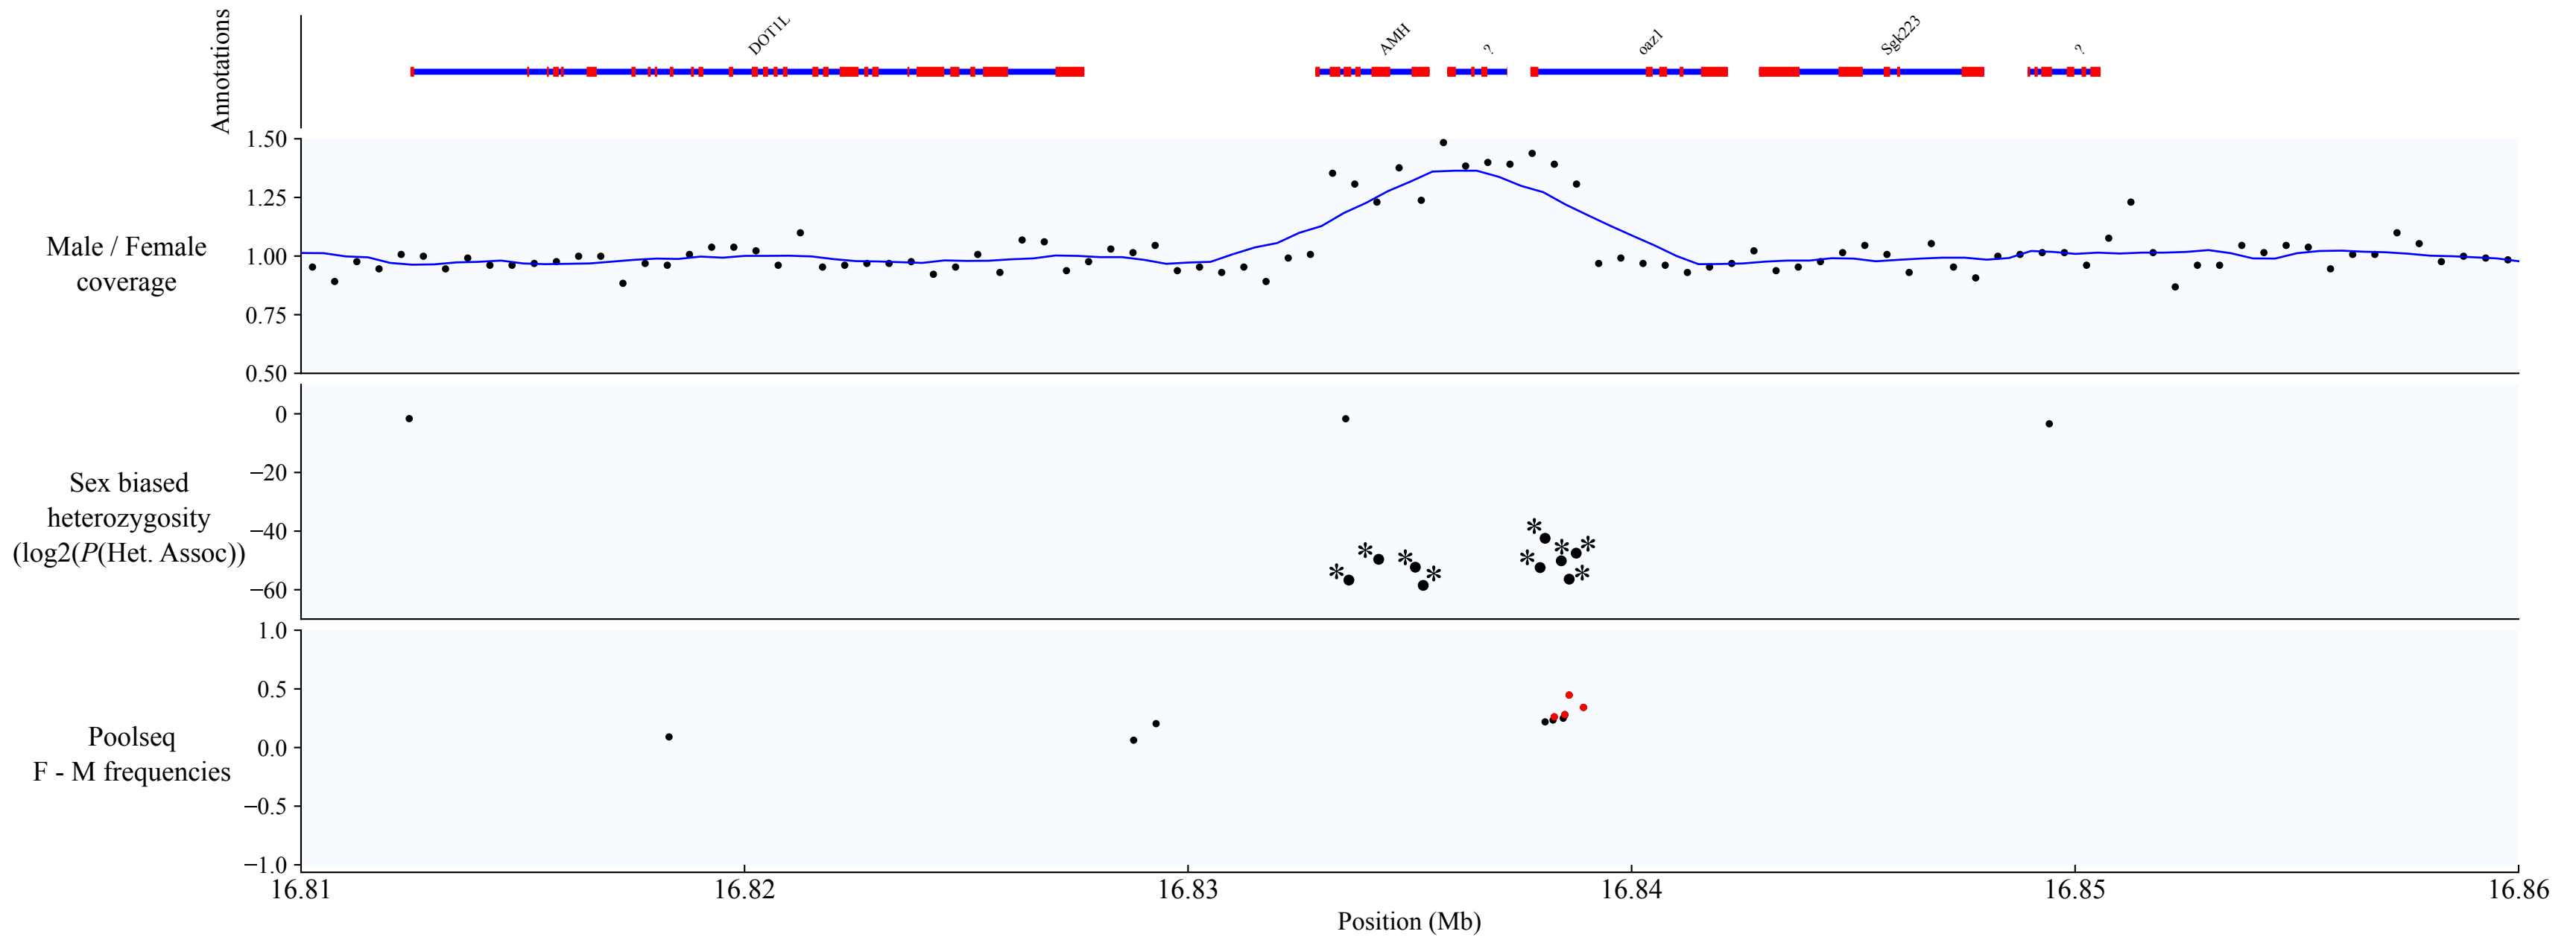

Supplement: JEB-35-1683-s007.pdf [file JEB-35-1683-s007.pdf]

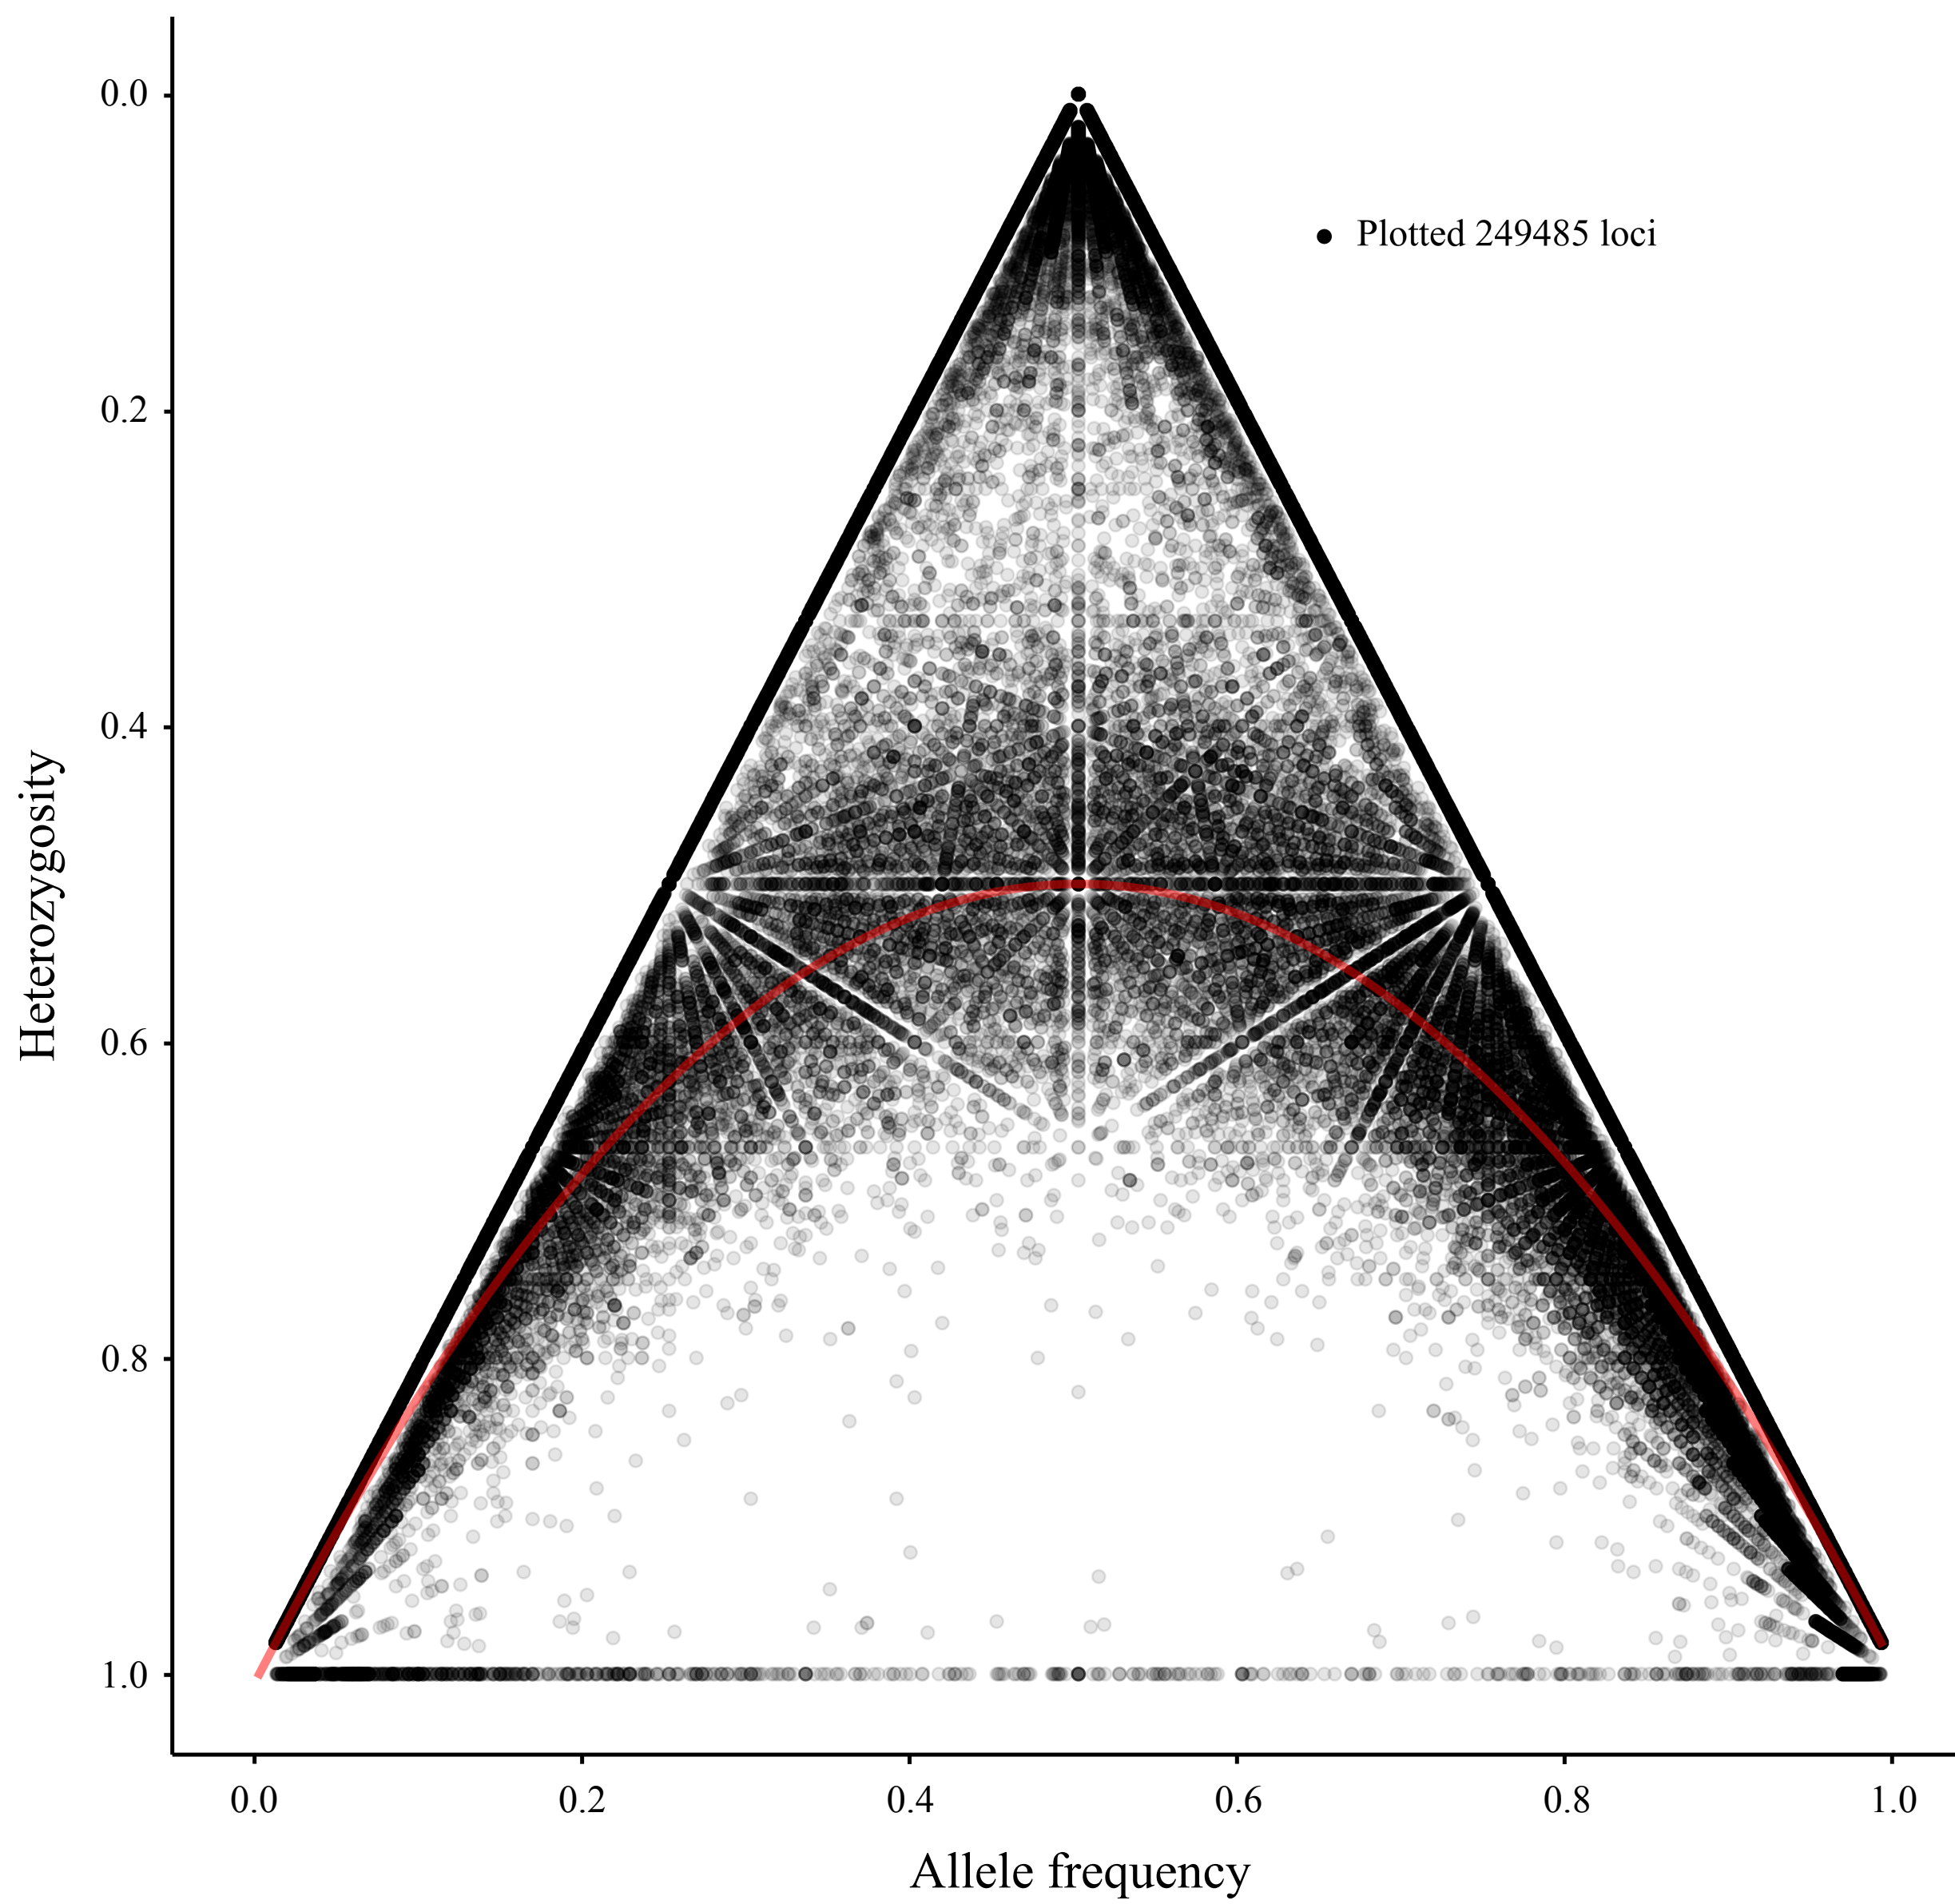

Supplement: JEB-35-1683-s009.pdf [file JEB-35-1683-s009.pdf]
